# Supplementary material for: Association of FGF4L1 Retrogene Insertion with Prolapsed Gland of the Nictitans (Cherry Eye) in Dogs
Source: MDPI journal article supplement (doi:10.3390/genes15020198), 2024-02-01

Cherry eye - Std. Bulldog cases (1164) vs controls (932)

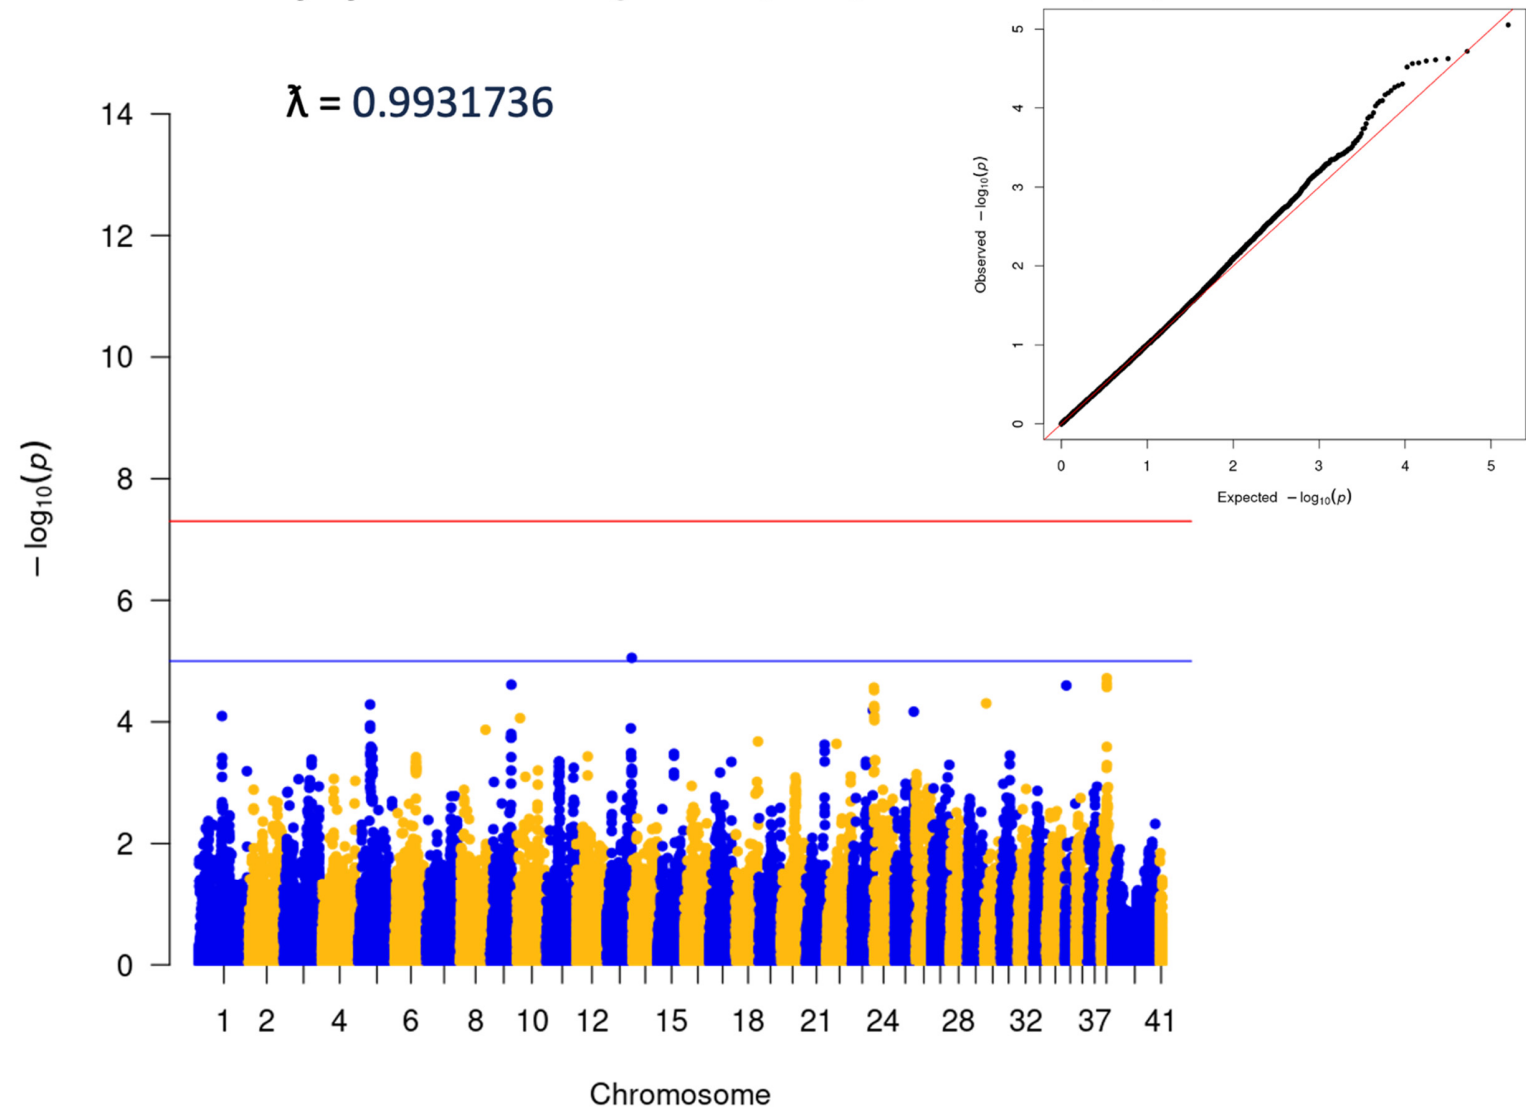

Cherry eye - French Bulldog cases (595) vs controls (660)

$\lambda = 1.014844$

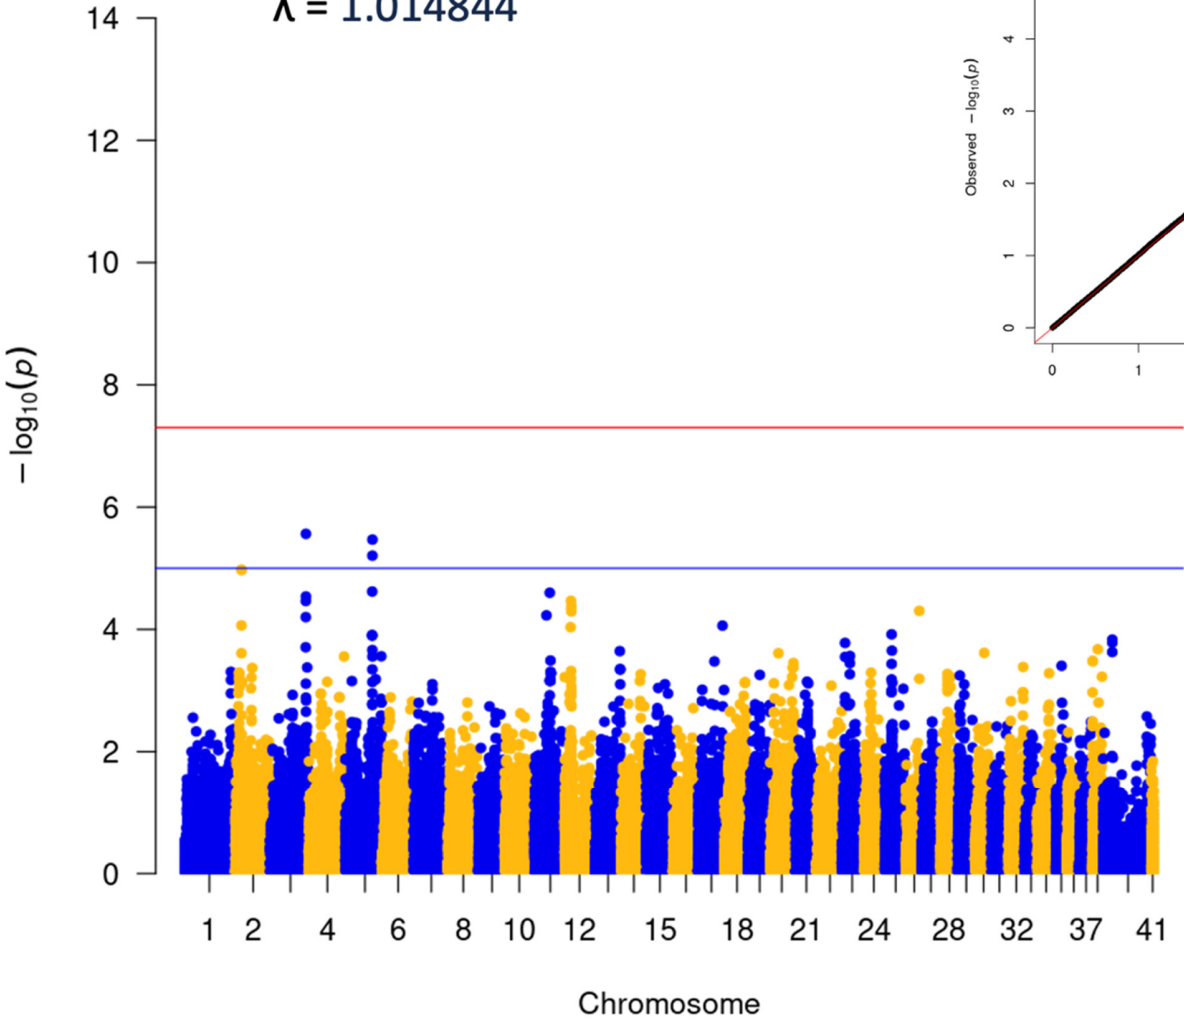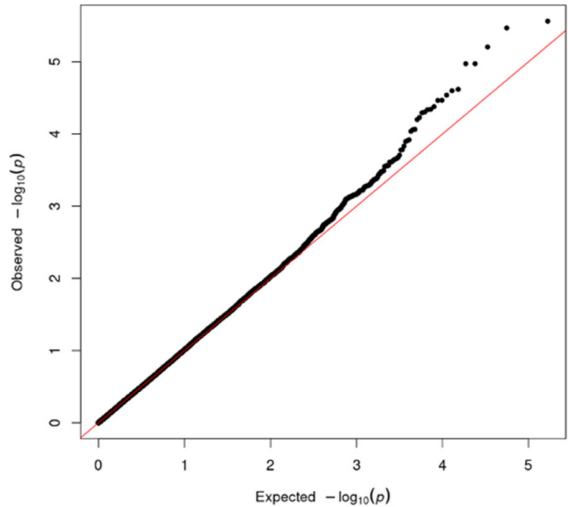

Cherry eye - Great Dane cases (231) vs controls (464)

$\lambda = 1.023505$

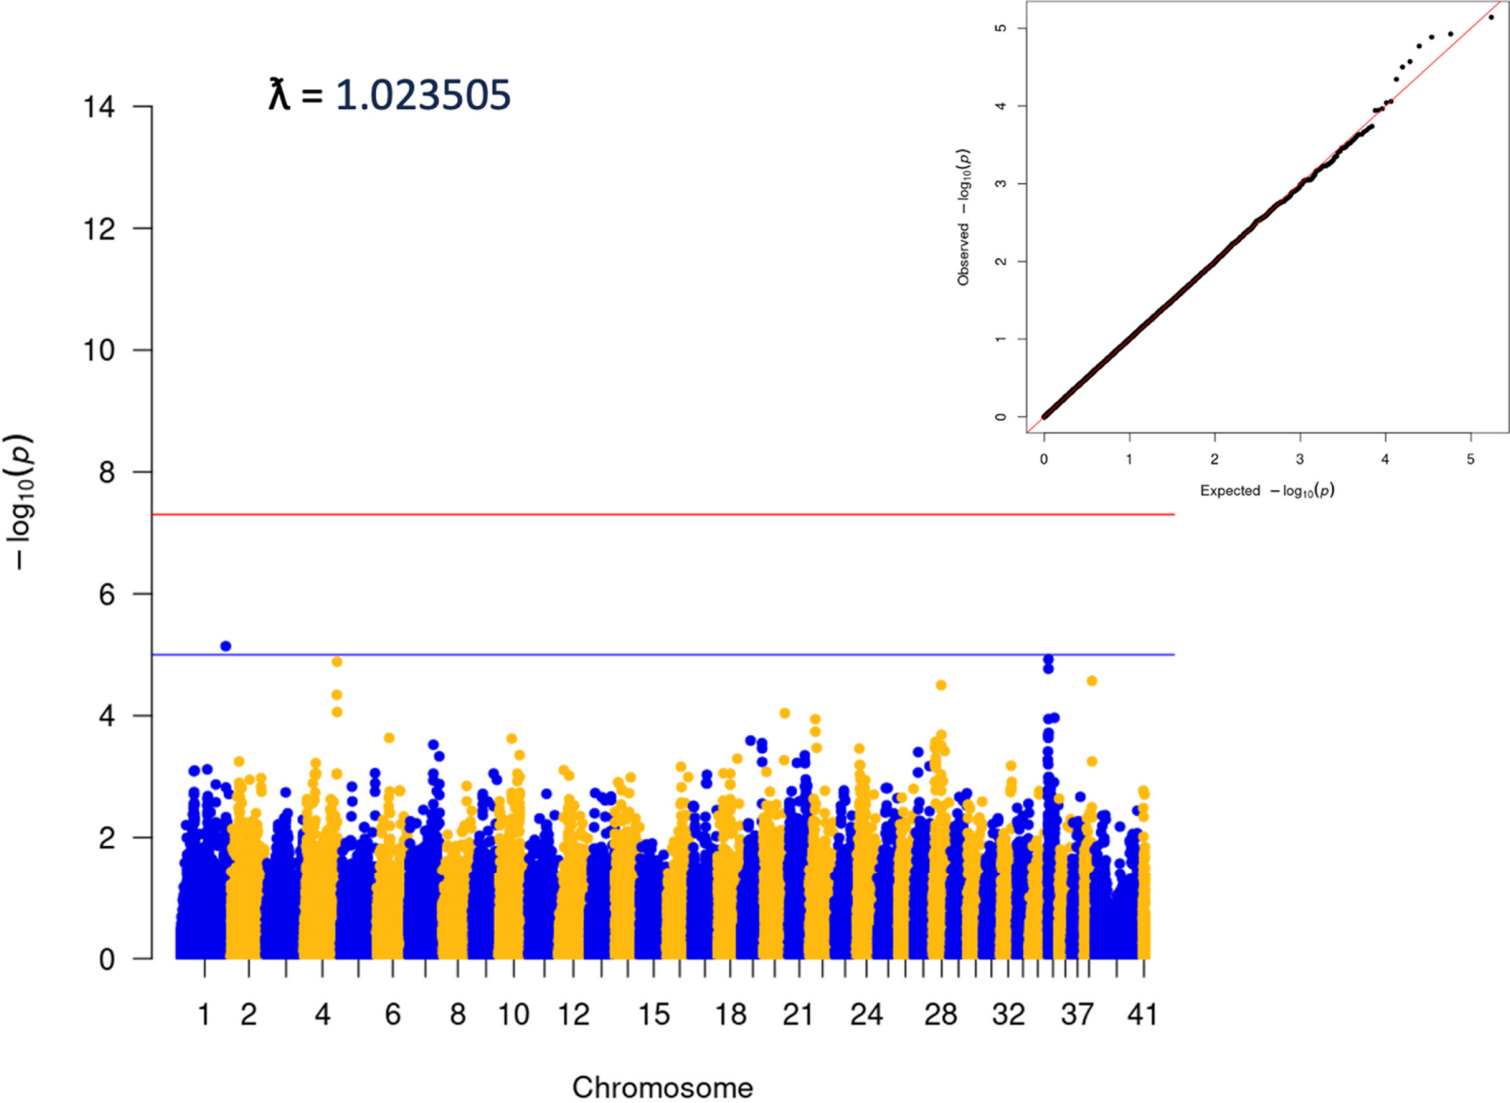

Cherry eye - Cocker Spaniel cases (225) vs controls (450)

$\lambda = 0.9956623$

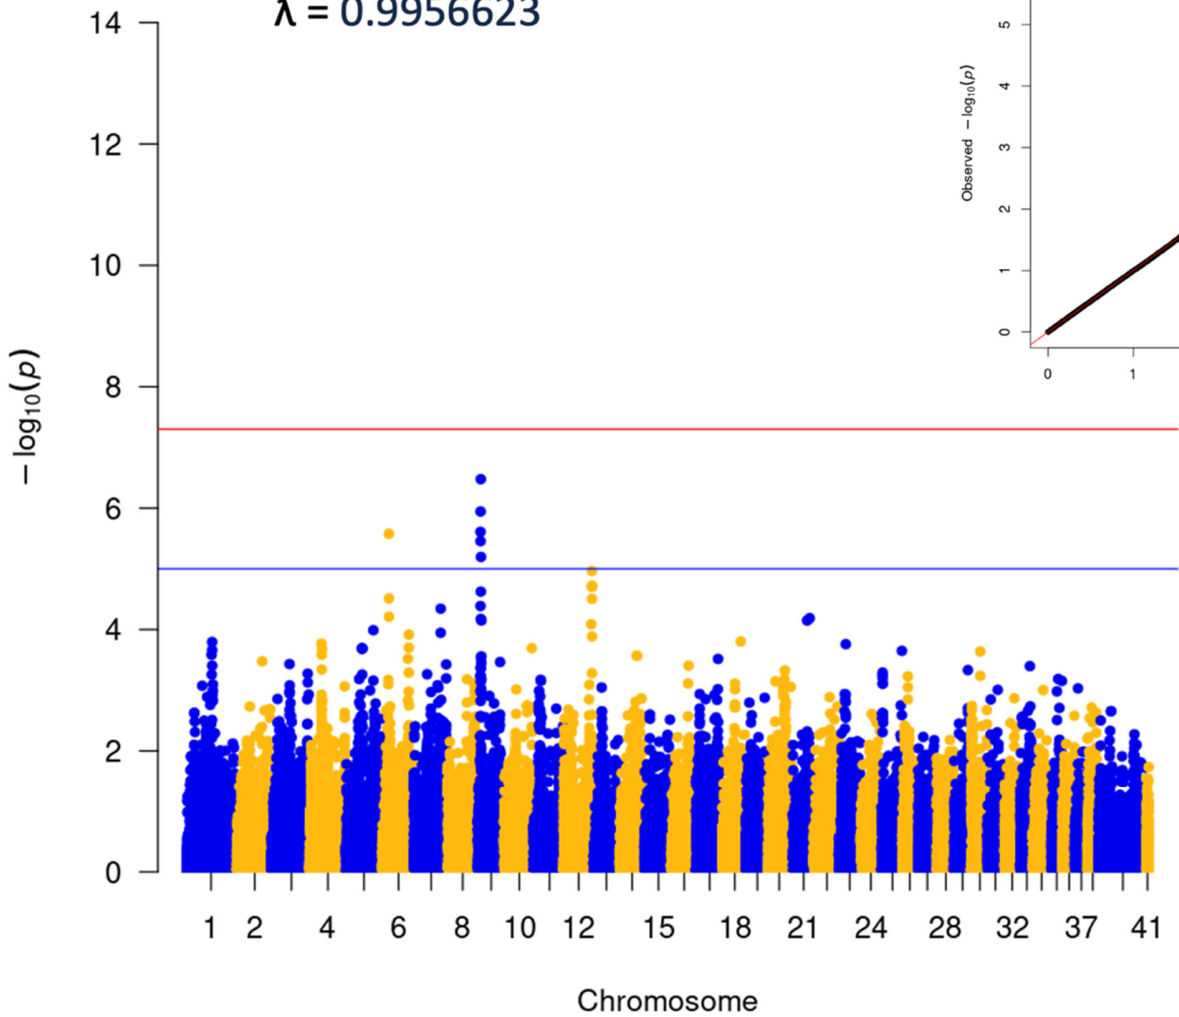

# Cherry eye - Boston Terrier cases (230) vs controls (246)

$\lambda = 1.010146$

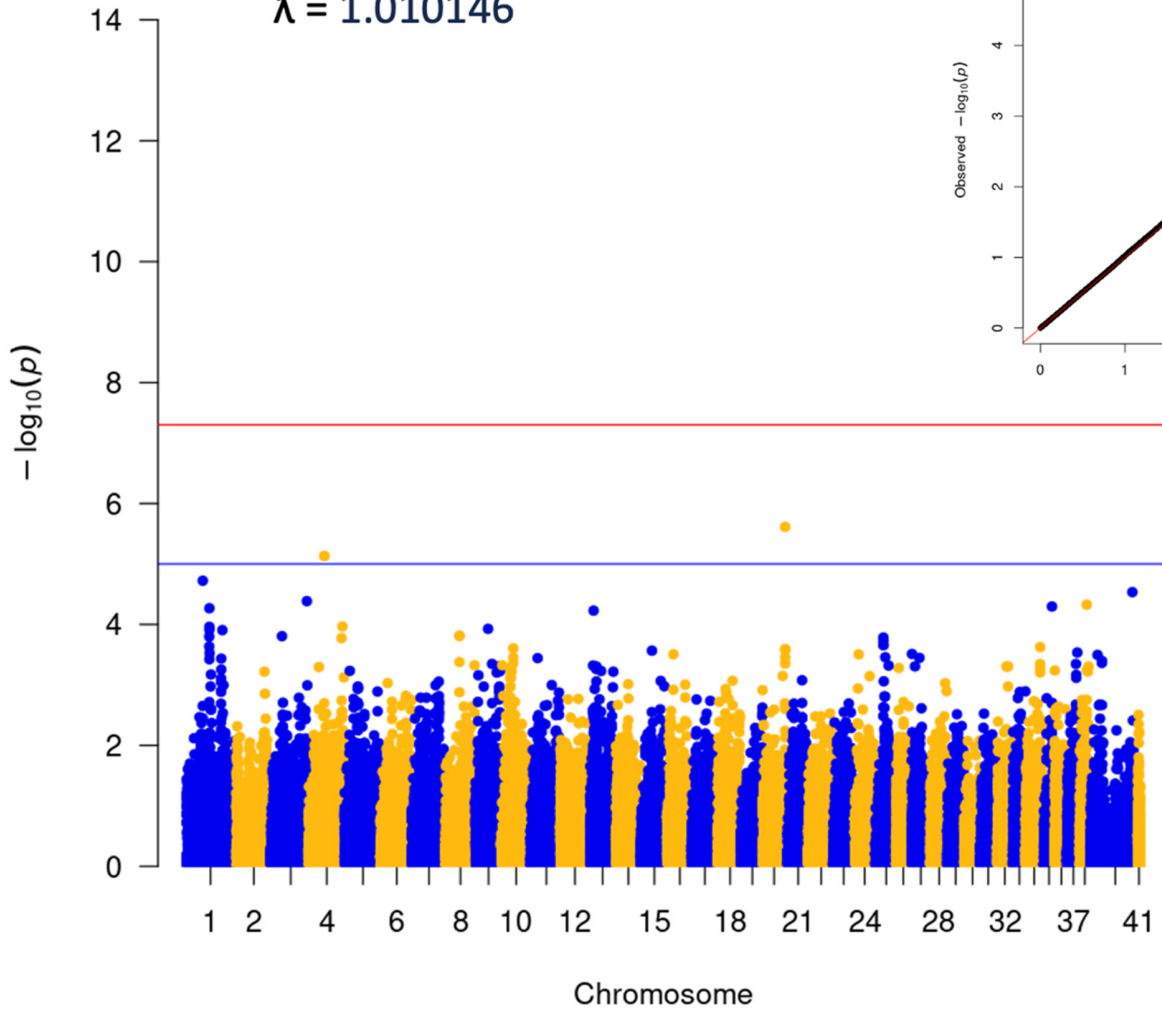

# Cherry eye - Chihuahua cases (187) vs controls (232)

$\lambda = 1.003531$

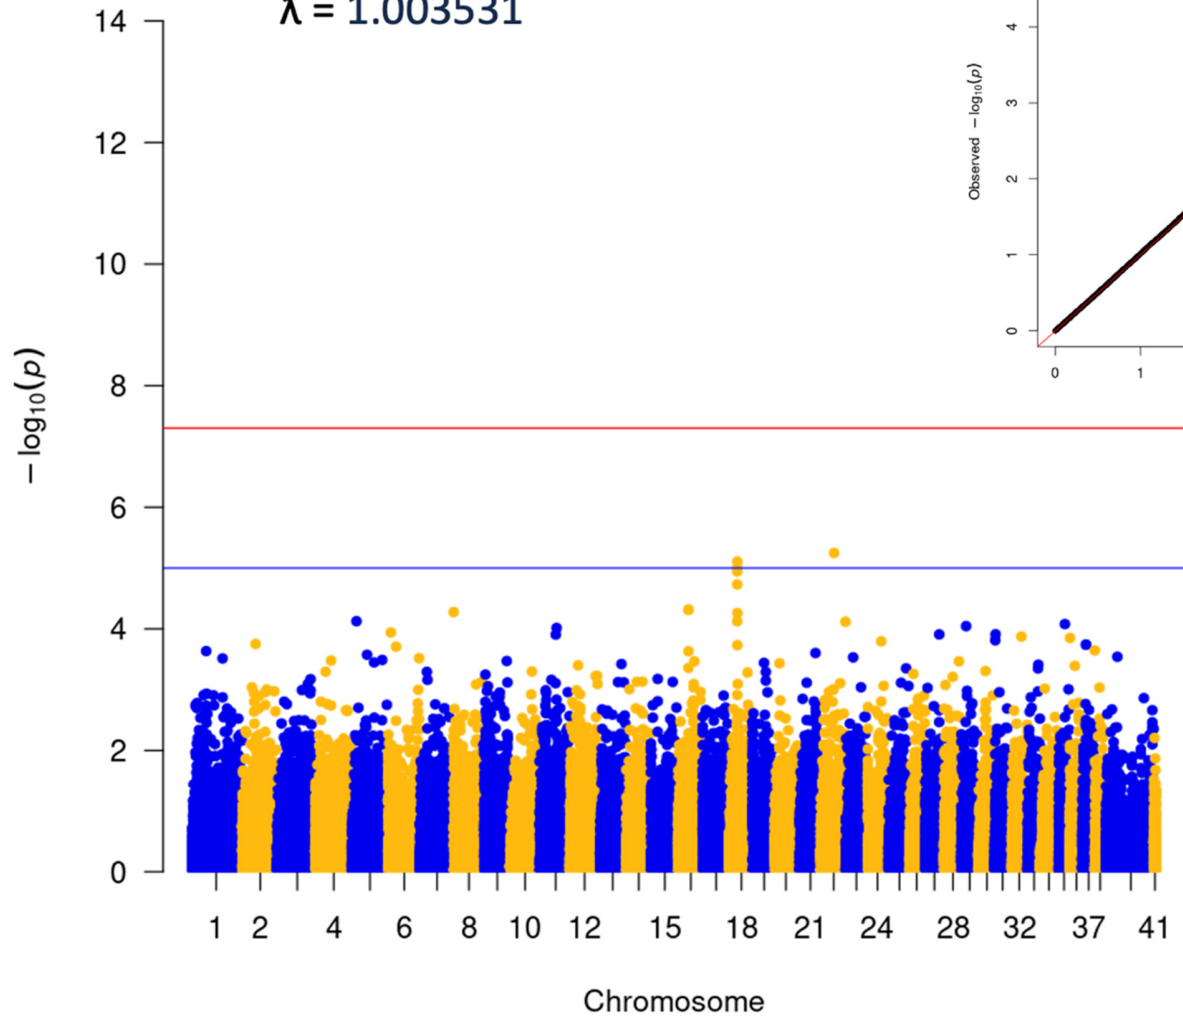

# Cherry eye - Shih Tzu cases (170) vs controls (373)

$\lambda = 1.030096$

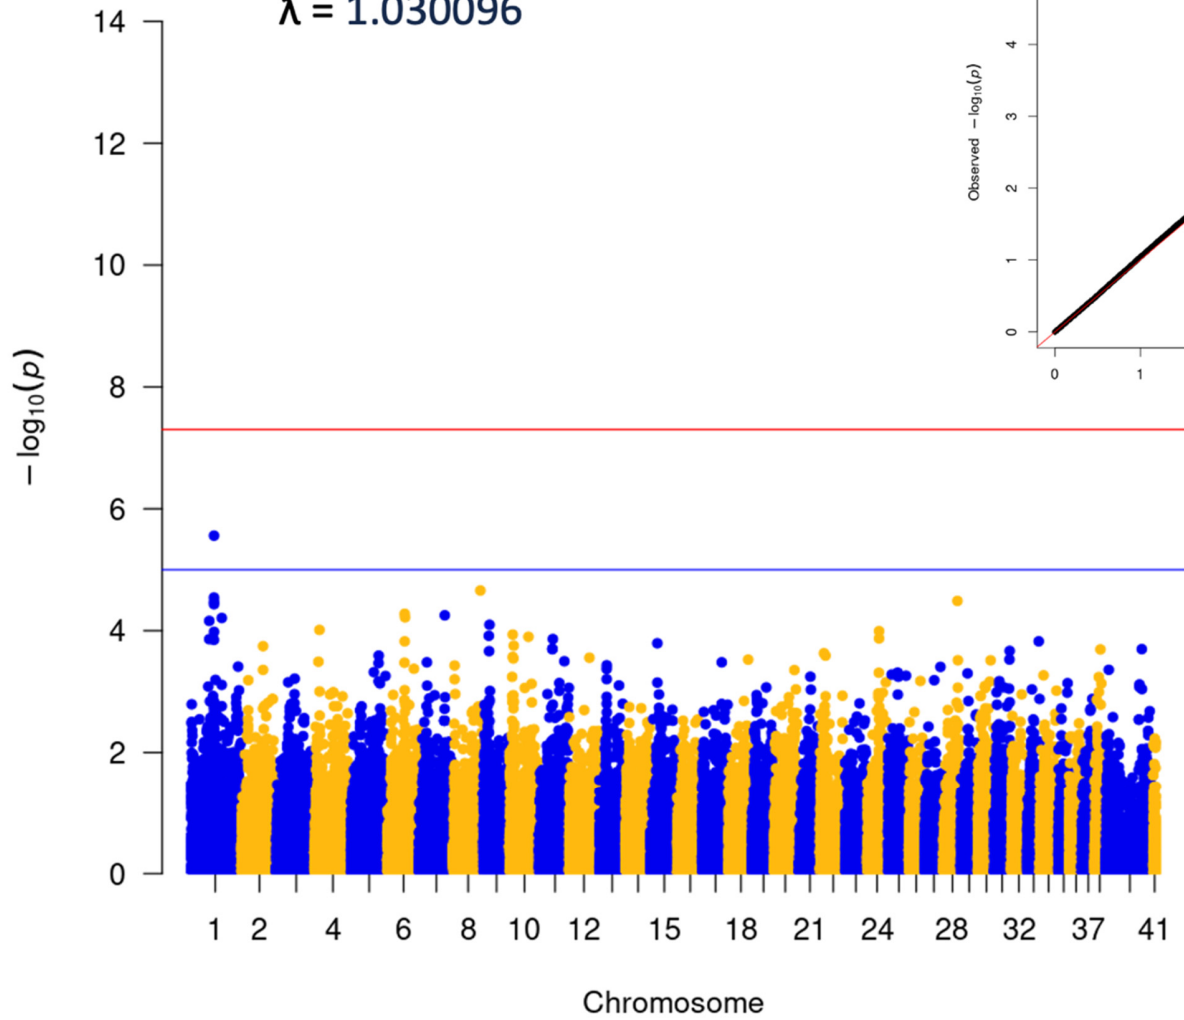

Cherry eye - Rottweiler cases (111) vs controls (136)

$\lambda = 1.054468$

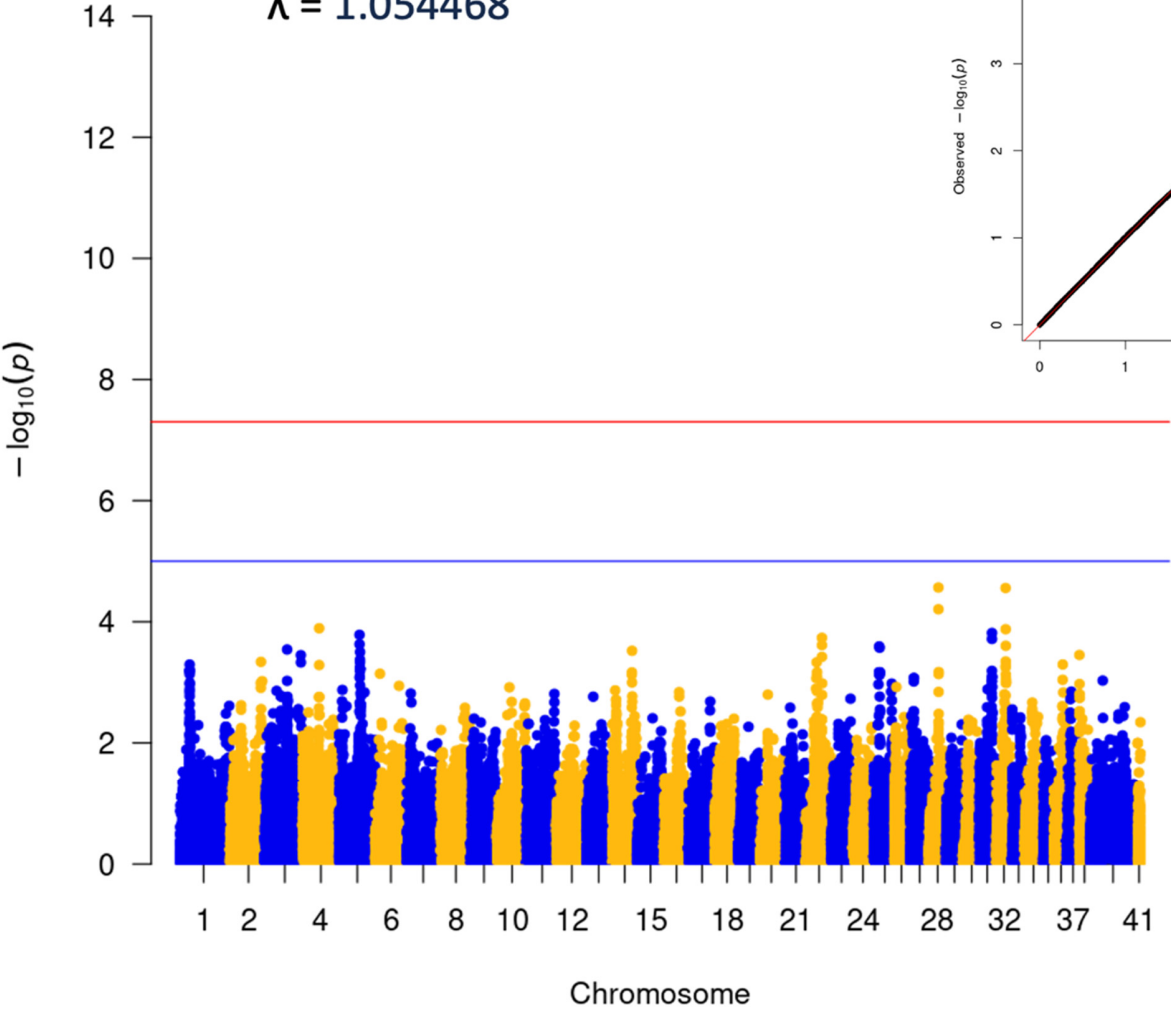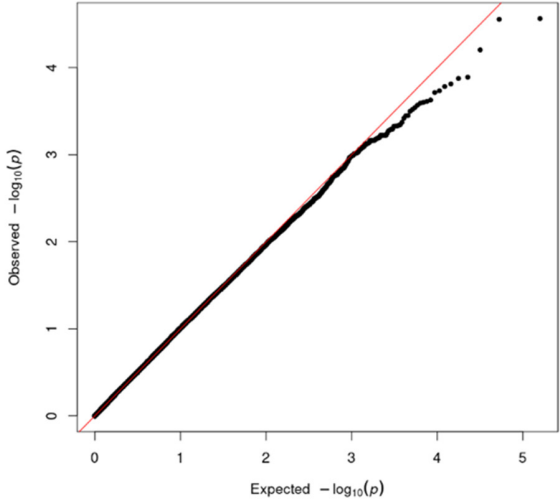



Cherry eye - Puggle cases (114) vs. controls (177)

$\lambda = 1.011103$

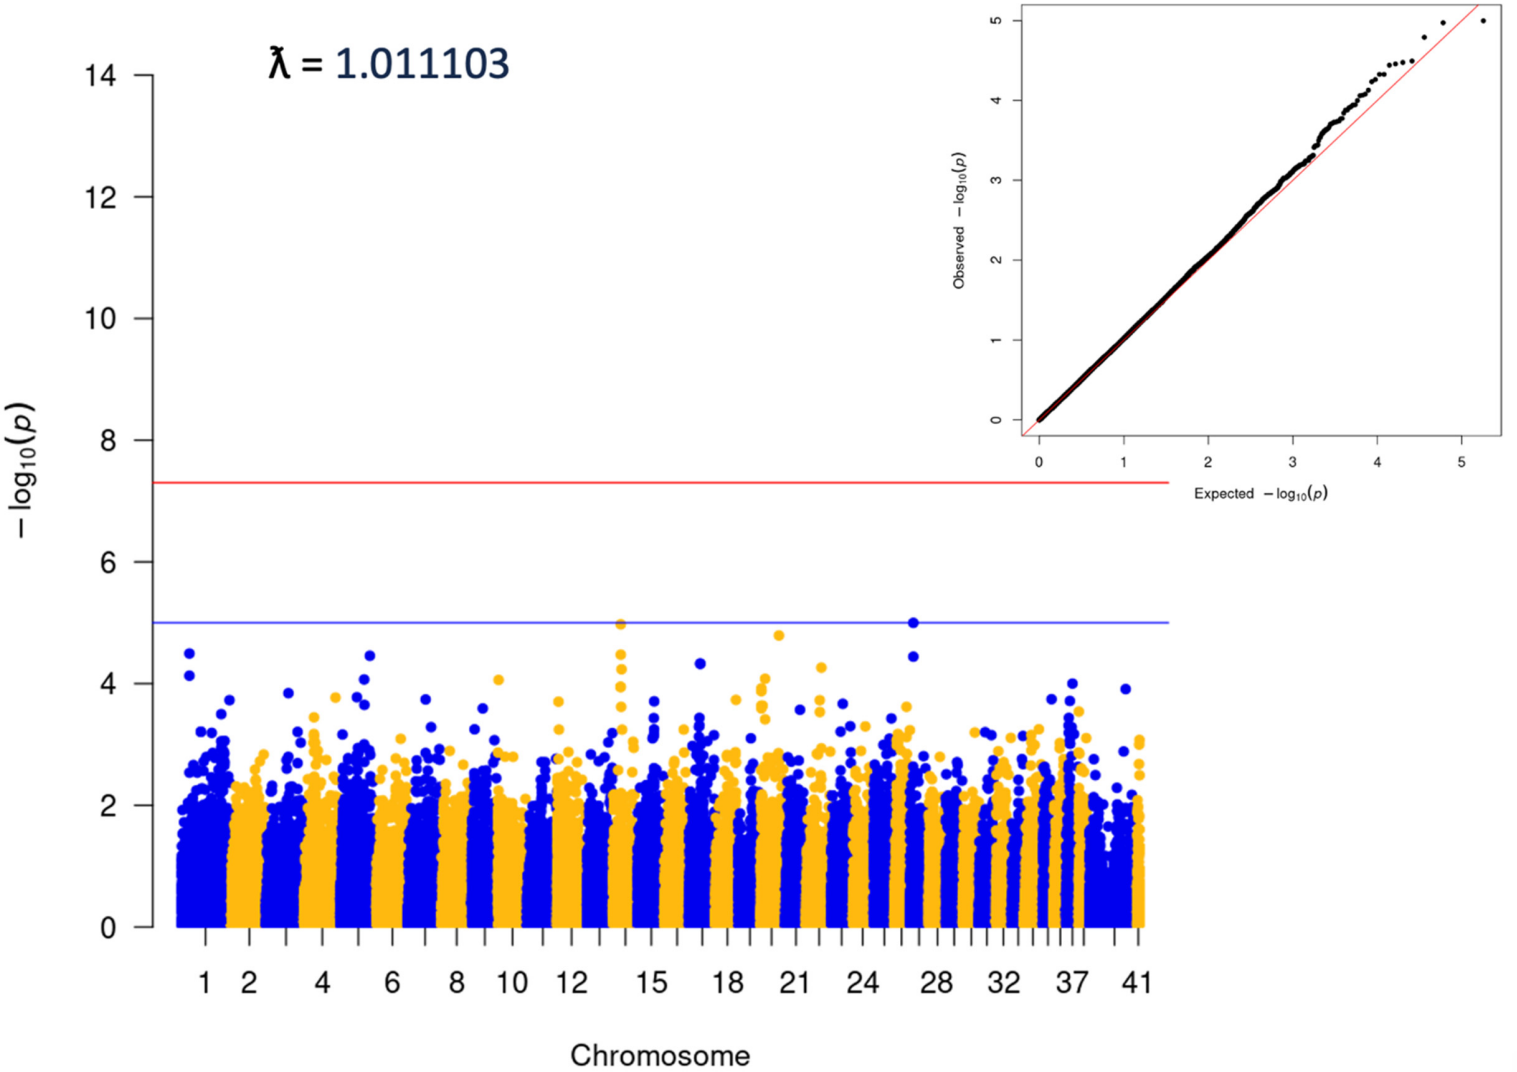

Supplement: s1 [file s1]
