# Supplementary material for: Association of FGF4L1 Retrogene Insertion with Prolapsed Gland of the Nictitans (Cherry Eye) in Dogs
Source: MDPI journal article supplement (doi:10.3390/genes15020198), 2024-02-01
Supplement: s1 [file s1]

| GWAS Analysis         | Chromosome    | SNP              | P-value             |
|-----------------------|---------------|------------------|---------------------|
| Doodle (Large)        | 2942 (43.57%) | 1                | < 0.001             |
|                       | 3811 (56.43%) | 1.10 (1.05-1.15) |                     |
| Doodle (Small)        | 2773 (41.06%) | 1                | < 10 <sup>-16</sup> |
|                       | 3980 (58.94%) | 0.79 (0.76-0.83) |                     |
| No <i>FGF4L1</i> dogs | 3826 (56.66%) | 1                | < 0.0001            |
|                       | 2927 (43.34%) | 1.79 (1.70-1.88) |                     |
| Mixed breed only      | 522 (7.73%)   | 1                | < 10 <sup>-16</sup> |
|                       | 2072 (30.68%) | 7.60 (6.90-8.36) |                     |
|                       | 332 (4.92%)   | 1.52 (1.32-1.74) |                     |
|                       | 3827 (56.67%) | 1.61 (1.47-1.77) |                     |

| GWAS Analysis         | Chromosome | SNP         | P-value  | Gene             |
|-----------------------|------------|-------------|----------|------------------|
| No <i>FGF4L1</i> dogs | 3          | 3:91269525  | 1.51E-09 | <i>LCORL</i>     |
|                       | 6          | 6:9777717   | 1.94E-08 | <i>CYP3A26</i>   |
|                       | 8          | 8:880421    | 2.38E-08 |                  |
| Doodle (Large)        | 3          | 3:91269525  | 4.42E-15 | <i>LCORL</i>     |
| Doodle (Small)        | 18         | 18:20444999 | 2.56E-09 | <i>FGF4L1</i>    |
| Mixed breed only      | 6          | 6:9777717   | 4.07E-11 | <i>CYP3A26</i>   |
|                       | 8          | 8:880421    | 2.22E-10 |                  |
|                       | 17         | 17:57776247 | 1.02E-08 | <i>CHD1L</i>     |
|                       | 22         | 22:24394293 | 6.42E-08 | <i>KLHL1</i>     |
|                       | 32         | 32:4842721  | 6.48E-09 | <i>C32H4orf2</i> |
