# Supplementary material for: Association of FGF4L1 Retrogene Insertion with Prolapsed Gland of the Nictitans (Cherry Eye) in Dogs
Source: Genes (Basel). 2024 Feb 1;15(2):198. doi: 10.3390/genes15020198 (PMC10887708; doi:10.3390/genes15020198)
Supplement: Supplementary file 1 [file genes-15-00198-s001.zip]

Archive with 4 entries (4 files):
- Cherry_eye_Supp_Figure_S1.pdf
- Cherry_eye_Supp_Figure_S2.pdf
- Cherry_eye_Supp_table_S1.xlsx
- Cherry_eye_Supp_table_S2.pdf
