# Supplementary material for: Association of FGF4L1 Retrogene Insertion with Prolapsed Gland of the Nictitans (Cherry Eye) in Dogs
Source: Genes (Basel). 2024 Feb 1;15(2):198. doi: 10.3390/genes15020198 (PMC10887708; doi:10.3390/genes15020198)
Supplement: Supplementary file 1 [file genes-15-00198-s001.zip › Cherry_eye_Supp_table_S1.xlsx]

## Sheet: Sheet1
Breed	Cases	Controls	Total	Cherry eye prevalence (%)	Odds ratio (OR) compared to mixed breed dogs	0.95 CI lower limit	0.95 CI upper limit	P-value*
Neapolitan Mastiff	15	52	67	22.3881	40.2562	22.6451	71.5636	< 0.00001
Bulldog (standard)	1068	4728	5796	18.4265	31.5238	29.2862	33.9324	< 0.0001
Cocker Spaniel	208	2058	2266	9.17917	14.1047	12.1874	16.3236	< 0.0001
Tibetan Mastiff	2	31	33	6.06061	9.00354	2.154	37.6341	0.0231
Great Dane	227	4121	4348	5.22079	7.6872	6.7006	8.819	< 0.0001
Boston Terrier	199	4663	4862	4.09297	5.9557	5.1498	6.8877	< 0.0001
Redbone Coonhound	2	58	60	3.33333	4.81224	1.1749	19.7103	0.0684
French Bulldog	525	18467	18992	2.76432	3.96742	3.6173	4.3515	< 0.0001
Coton de Tulear	2	76	78	2.5641	3.6725	0.9016	14.9585	0.1068
Havanese	1	40	41	2.43902	3.48887	0.4795	25.3856	0.2538
Chihuahua	96	4124	4220	2.27488	3.24861	2.6469	3.9871	< 0.0001
Basset Hound	28	1289	1317	2.12604	3.03145	2.0819	4.4141	< 0.0001
Newfoundland	9	427	436	2.06422	2.94144	1.5188	5.6965	0.0046
Chinese Shar Pei	10	489	499	2.00401	2.85388	1.5246	5.342	0.0035
Blue Tick Coonhound	2	102	104	1.92308	2.73637	0.6749	11.0944	0.1695
Presa Canario	1	52	53	1.88679	2.68375	0.3709	19.4185	0.3151
Schnauzer (giant)	5	300	305	1.63934	2.32591	0.9605	5.6322	0.0687
Beagle	68	4565	4633	1.46773	2.0788	1.6327	2.6468	< 0.0001
Rottweiler	101	6870	6971	1.44886	2.05168	1.6814	2.5035	< 0.0001
Saint Bernard	11	848	859	1.28056	1.81026	0.9978	3.2841	0.047432
All purebred	2927	228647	231574	1.26396	1.7865	1.7021	1.8751	< 0.0001
Bloodhound	4	331	335	1.19403	1.68646	0.6289	4.5224	0.3088
Shih Tzu	79	7463	7542	1.04747	1.47727	1.1809	1.8481	0.000589
Boerboel	2	210	212	0.943396	1.32909	0.3301	5.3515	0.6656
Dogue de Bordeaux	2	213	215	0.930233	1.31037	0.3255	5.2756	0.6681
Pointing Griffon Wire	1	108	109	0.917431	1.29217	0.1803	9.2594	0.5409
Chinese crested	1	109	110	0.909091	1.28032	0.1787	9.1737	0.5441
Airedale Terrier	2	225	227	0.881057	1.24049	0.3082	4.9925	0.6783
Whippet	1	123	124	0.806452	1.13459	0.1585	8.1212	0.5875
Maltese	7	911	918	0.762527	1.07232	0.5094	2.2573	0.86249
English Springer Spaniel	6	801	807	0.743494	1.04535	0.4679	2.3353	0.920344
Mixed Breed	3826	533937	537763	0.711466	1	0.956	1.046	1
Rhodesian Ridgeback	2	340	342	0.584795	0.820911	0.2044	3.297	1
Bichon Frise	6	1070	1076	0.557621	0.782551	0.3506	1.7469	0.548506
Boxer	29	5392	5421	0.534957	0.750573	0.5204	1.0826	0.123687
American Staffordshire Terrier	14	2920	2934	0.477164	0.669099	0.3954	1.1323	0.1319
Boykin Spaniel	1	211	212	0.471698	0.661398	0.0927	4.7185	1
German Shorthaired Pointer	9	1909	1918	0.469239	0.657933	0.3415	1.2674	0.207326
Poodle (medium and standard)	24	5209	5233	0.458628	0.642987	0.43	0.9614	0.029988
Dalmatian	5	1142	1147	0.43592	0.611011	0.2537	1.4717	0.267407
American Pit Bull Terrier	2	553	555	0.36036	0.504719	0.1259	2.0239	0.4508
Miniature American Shepherd	4	1167	1171	0.341588	0.478337	0.1791	1.2773	0.1319
Great Pyrenees	5	1543	1548	0.322997	0.452219	0.1878	1.0887	0.06928
Bernese Mountain Dog	3	1093	1096	0.273723	0.383042	0.1233	1.19	0.084822
Dachshund	22	8257	8279	0.265733	0.371831	0.2444	0.5657	< 0.0001
Dobermann Pinscher	9	3583	3592	0.250557	0.350543	0.1821	0.6748	0.001026
Chow chow	2	824	826	0.242131	0.338725	0.0845	1.3572	0.108908
Pomeranian	11	6308	6319	0.174078	0.243358	0.1346	0.44	< 0.0001
Bull Terrier	1	593	594	0.16835	0.235337	0.0331	1.6739	0.1405
Mastiff	1	654	655	0.152672	0.213387	0.03	1.5176	0.1003
Miniature Pinscher	1	667	668	0.149701	0.209228	0.0294	1.4879	0.1013
Belgian Malinois	2	1390	1392	0.143678	0.200798	0.0501	0.804	0.011738
Pug	10	7024	7034	0.142167	0.198683	0.1068	0.3697	< 0.0001
Cavalier King Charles Spaniel	3	2176	2179	0.137678	0.192401	0.062	0.5973	0.001443
Weimaraner	1	746	747	0.133869	0.187071	0.0263	1.3302	0.060268
Australian Shepherd	2	1802	1804	0.110865	0.154889	0.0387	0.62	0.002407
Poodle (miniature and toy)	6	5960	5966	0.10057	0.140491	0.0631	0.313	< 0.0001
Australian Cattle Dog	2	2015	2017	0.0991572	0.138516	0.0346	0.5544	0.001071
Pembroke Welsh Corgi	6	6119	6125	0.0979592	0.136841	0.0614	0.3049	< 0.0001
Yorkshire Terrier	10	10652	10662	0.093791	0.131013	0.0704	0.2438	< 0.0001
Labrador Retriever	16	17209	17225	0.0928882	0.129751	0.0794	0.2121	< 0.0001
Golden Retriever	16	17280	17296	0.0925069	0.129217	0.0791	0.2112	< 0.0001
Schnauzer (miniature)	3	6832	6835	0.0438917	0.06128	0.0197	0.1901	< 0.0001
German Shepherd Dog	6	16409	16415	0.0365519	0.0510287	0.0229	0.1137	< 0.0001
Siberian Husky	2	10799	10801	0.0185168	0.0258459	0.0065	0.1034	< 0.0001
* Pearson chi square P-value or Fisher's exact test whenever any expected cell frequency was <5
