# Supplementary figures and images for: Association of FGF4L1 Retrogene Insertion with Prolapsed Gland of the Nictitans (Cherry Eye) in Dogs
Source: MDPI journal article supplement (doi:10.3390/genes15020198), 2024-02-01

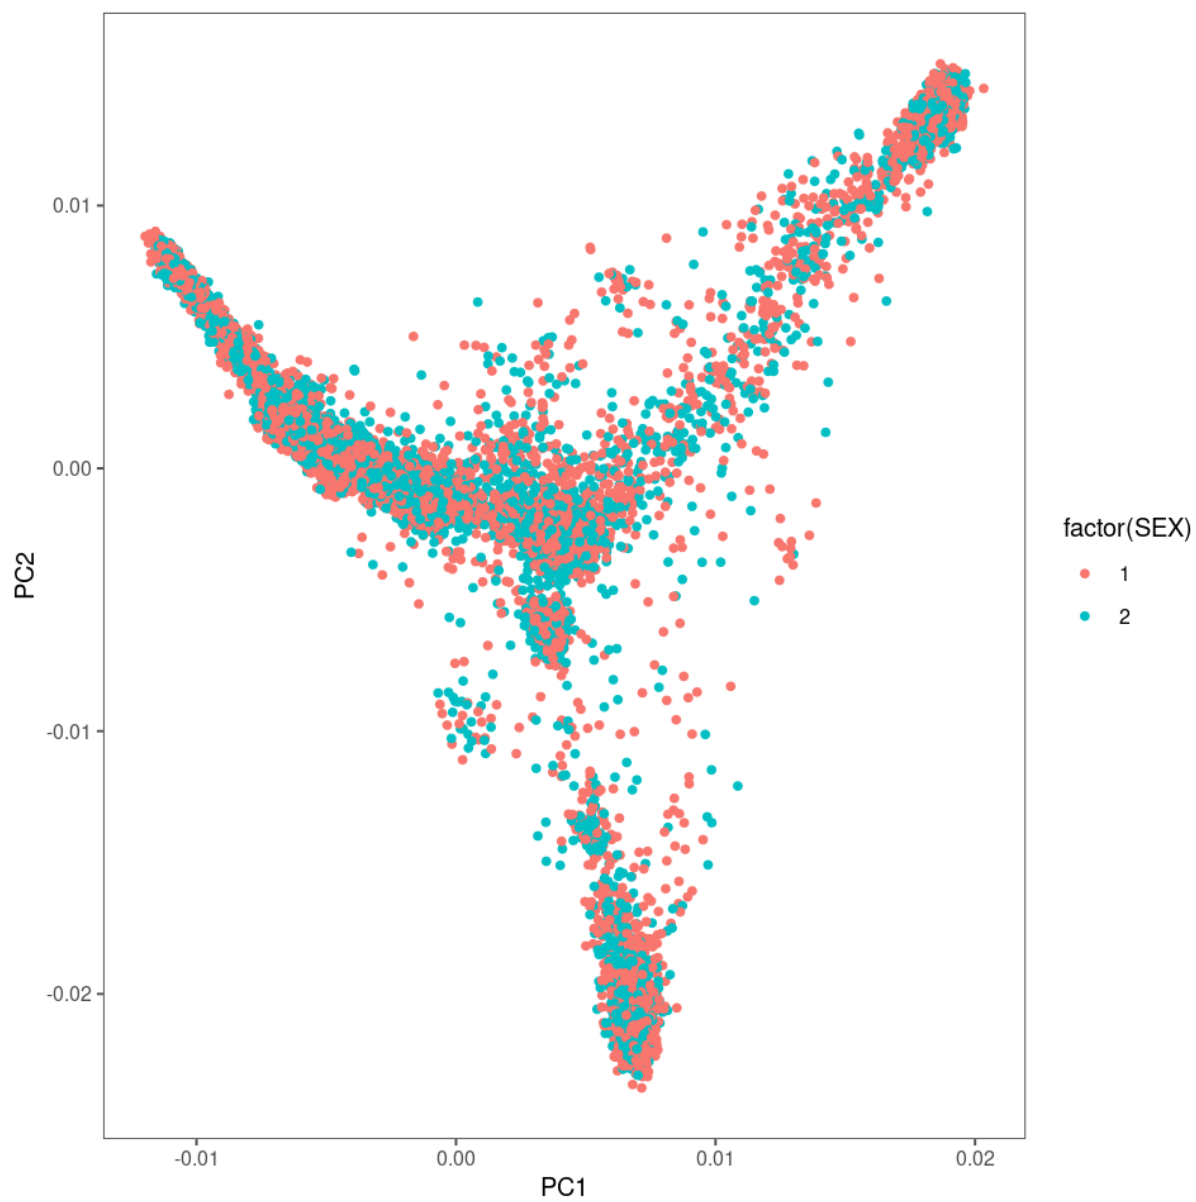

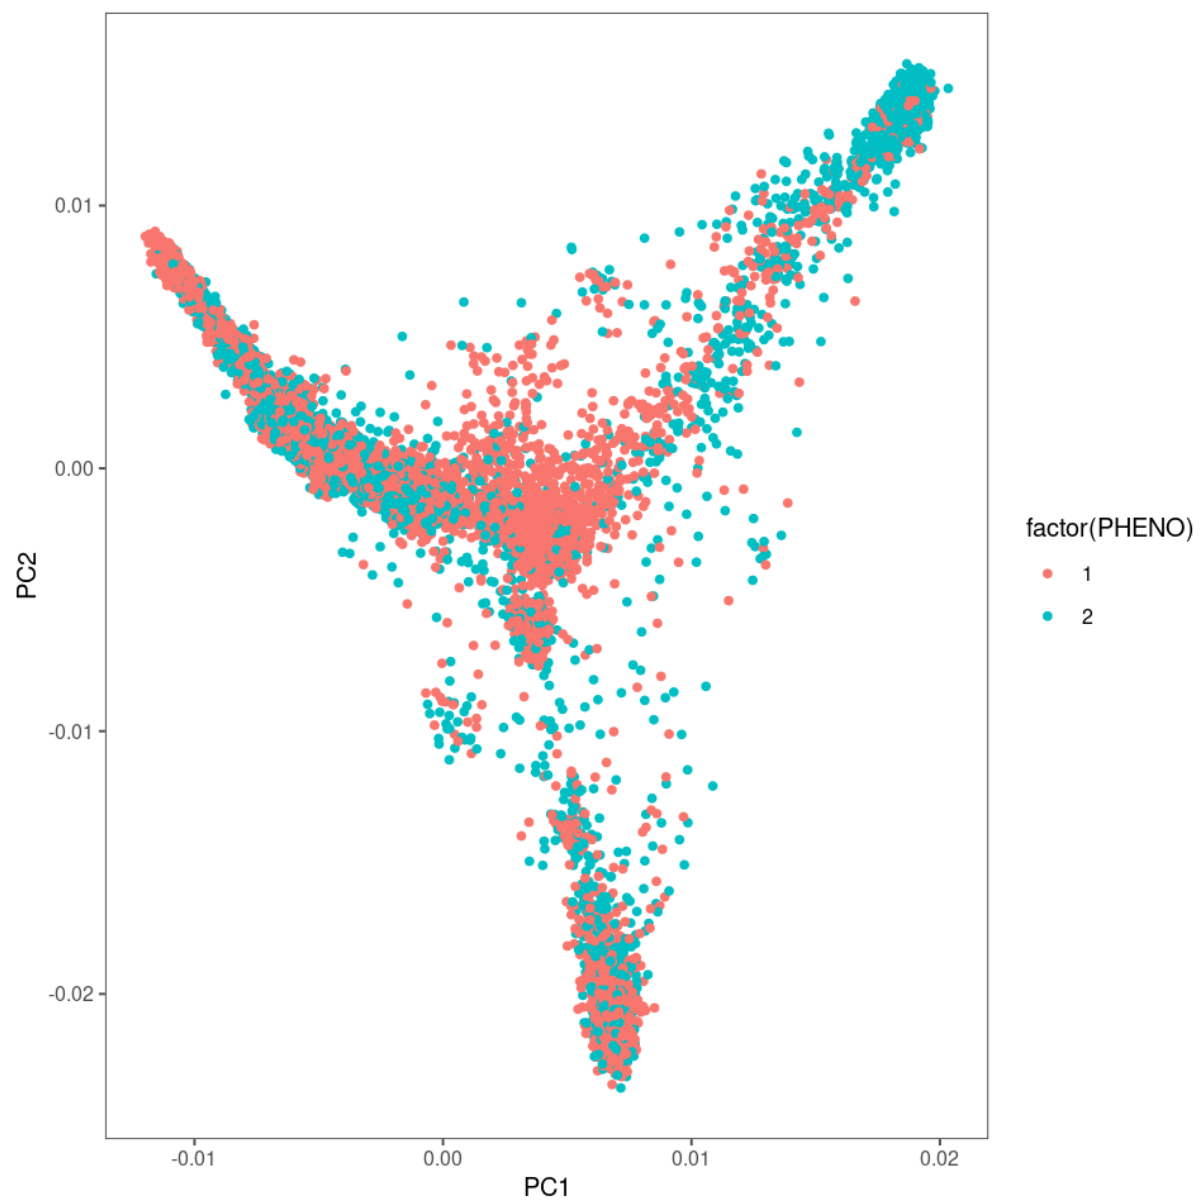

**Supplemental Figure S1.** PCA plots by gender (1 = male, 2 = female) and phenotype (control = 1, case = 2).

Supplement: s1 [file s1]
